# Supplementary material for: Impact of Estrogen Therapy on Lymphocyte Homeostasis and the Response to Seasonal Influenza Vaccine in Post-Menopausal Women
Source: PLoS One. 2016 Feb 9;11(2):e0149045. doi: 10.1371/journal.pone.0149045 (PMC4747494; doi:10.1371/journal.pone.0149045)
Supplement: S1 File — (XLSX) [file pone.0149045.s001.xlsx]

## Sheet: summary
Subject ID	Group	Visit	LY	IL-6 pg/ml	Flu specific CD4 response	Flu specific CD8 response	% responding CD4 T cells- CD3 stim	% responding CD8 T cells to CD3 stim	CD4	CD4 CM	CD4 EM	CD4 NA	CD8	CD8 CM	CD8 EM	CD8 NA	CD20	CD20 CD27+	CD20 CD27-	IgG fold increase over baseline
1	A	1	2.01	1.11632			3.21	5.44	1.1256	0.221743	0.00686616	0.820562	0.24522	0.0247672	0.0304073	0.168957	0.30351	0.0427949	0.260715
1	A	2	1.39		0	0														8.14549
1	A	3	1.99		0	0														8.2481
2	A	1	2.98	0.11151			8.54	1.2	1.15922	0.325741	0.00568018	0.766244	0.67646	0.054658	0.0397758	0.528315	0.36952	0.0842506	0.285269
2	A	2	2.55		0.32901	0.146														10.4591
2	A	3	1.95		0.43336	0.107														9.70976
4	A	1	1.22	1.77817			1.70954	1.709	0.77592	0.229672	0.0068281	0.536937	0.244	0.06466	0.0039284	0.171044	0.12566	0.108696	0.0169641
4	A	2	2.32		0.00551	8e-05														1.51369
4	A	3	1.81		0.02651	0.0137														2.82634
7	A	1	2.33	0.38034			9.7	7.98	1.00889	0.333943	0.0770792	0.574058	0.51726	0.105004	0.243112	0.154143	0.36348	0.0479794	0.315501
7	A	2	3.45		0.23533	0.318														1.74407
7	A	3	1.74		0.022	0.281														0.968345
9	A	1	2.22	1.53735			0.08	0.09	0.32085	0.0965759	0.00532611	0.217536	0.13869	0.0267672	0.0116777	0.0976378	0.10488	0.0855821	0.0192979
9	A	2	2.1		0.09793	0.06325														12.3809
9	A	3	4.1		0.244	0.06489														13.6214
15	A	1	2.95	0.05327			2.74	5.27	1.5812	0.260898	0.0161282	1.2444	0.62245	0.179888	0.0666021	0.318072	0.4012	0.058174	0.343026
15	A	2	3.71		0	0.048														2.77123
15	A	3	2.44		0.26195	0.30876														0.955207
16	A	1	2.87	0.51964			29.5476	17.931	1.48092	0.170306	0.158458	1.04553	0.6888	0.0380218	0.28723	0.303072	0.38745	0.347155	0.0402948
16	A	2	2.18		0.162	0.152														6.44803
16	A	3	2.94		0.13035	0.001														2.75424
19	A	1	2.72	0.27859			1.03	2.05	1.17232	0.191088	0.0091441	0.871034	0.408	0.06732	0.04284	0.2448	0.47872	0.0799462	0.398774
19	A	2	1.98		0.39817	1.132														2.29186
19	A	3	2.81		0.74858	1.757														3.60792
20	A	1	2.1	0.41711			14.29	10.95	0.8295	0.333459	0.0266269	0.440464	0.4326	0.0986328	0.0363817	0.268645	0.2373	0.0600369	0.1775
20	A	2	4.08		0.03	0														1.80067
20	A	3	4.23		0	0														2.94289
21	A	1	2.68	0.40208			9.33	14.47	1.47132	0.31192	0.00632668	1.11673	0.59228	0.055082	0.229212	0.286071	0.30016	0.0558298	0.24433
21	A	2	3.2		0.33	0.213														1.38907
21	A	3	2.98		0.56302	0.80321														1.0607
22	A	1	2.83	0.13096			1.32	0.81	1.29331	0.214689	0.00969983	1.03982	0.54902	0.0697255	0.0900393	0.362902	0.33677	0.102041	0.234729
22	A	2	2.66		0.038	0.07922
22	A	3	2.74
23	A	1	3.43	0.22733			7.552	5.08	1.73558	0.16193	0.0230832	1.46309	0.80605	0.0557787	0.0878595	0.544084	0.38073	0.070435	0.310295
23	A	2	3.32		0.2361	0.075														4.59168
23	A	3	3.55		0.45575	0.16706														3.7
24	A	1	1.77	0.75293			5.4414	3.30994	0.84606	0.516943	0.00329963	0.2792	0.30267	0.0892877	0.0256059	0.1474	0.41949	0.0725718	0.346918
24	A	2	2.33		0.28888	0.53														1.55108
24	A	3	1.97		0.44848	0.549														2.61168
27	A	1	2.57	0.55919			4.26067	9.002	1.1051	0.224335	0.0912813	0.637643	0.48059	0.0410904	0.200887	0.17109	0.37265	0.065959	0.306691
27	A	2	3.39		0.05694	0.168														1.37152
27	A	3	2.86		0.038	0.064														1.11227
29	A	1	2.54	0.21649			1.31	2.13	1.4351	0.177952	0.0337249	1.194	0.3175	0.0365125	0.0415925	0.223202	0.42926	0.036573	0.392773
29	A	2	2.29		0.28186	0.65321														7.35206
29	A	3	2.21		0.32641	0.654														4.36812
3	B	1	1.36	0.66035			12.53	12.75	0.01972	0.00676396	0.000199172	0.01268	0.0204	0.0044472	0.0030192	0.0124236	0.004216	0.00148825	0.00272775
3	B	2	0.06		0.145	0.18305														0.927549
3	B	3	1.68		0.18032	0.17459														3.00368
6	B	1	2.37	0.66203			41.4845	27.55	1.25136	0.226496	0.00237758	0.986072	0.3555	0.0934965	0.0629235	0.161753	0.58065	0.514456	0.0661941
6	B	2	3.17		0.04361	0.02012														2.26328
6	B	3	3.52		0.3219	0.13298														1.32499
10	B	1	1.86	0.58493			10.47	15.2	1.30014	0.149516	0.0326335	1.07912	0.150474	0.0254301	0.0419822	0.0698199	0.133734	0.0143095	0.119424
10	B	2	1.3		0.09987	0														1.44528
10	B	3	1.45		0.05167	0														1.23137
11	B	1	1.53	3.81633			27.0118	21.403	0.86751	0.266326	0.000694008	0.567352	0.29223	0.125951	0.0182644	0.126828	0.17289	0.150587	0.0223028
11	B	2	2.56		0.07354	0.19														2.98757
11	B	3	2.43		0.15861	0.087														1.79461
12	B	1	2.07	6.45345			3.337	4.82825	1.09917	0.284685	0.0109917	0.756229	0.29394	0.0631971	0.0314516	0.170191	0.29601	0.268481	0.0274993
12	B	2	1.86		0.02916	0.8438														1.69899
12	B	3	2.87		0.53052	0.4238														1.36271
13	B	1	1.95	0.63583			26.739	21.181	0.8073	0.184064	0.0422218	0.528781	0.3354	0.0727818	0.10062	0.120744	0.47775	0.408954	0.068796
13	B	2	2.48		0.092	0.11														2.90367
13	B	3	2.23		0.0928	0.12379														3.85529
14	B	1	1.19	1.22226			12.292	8.66392	0.57001	0.0661212	0.000741013	0.482228	0.13923	0.0151761	0.0107486	0.103309	0.32725	0.296816	0.0303034
14	B	2	2.57		0.072003	0.08458														1.74812
14	B	3	3.36		0.075	0.00338														3.72917
18	B	1	2.36	0.63424			36.25	52.17	1.24136	0.158894	0.316547	0.734885	0.32096	0.0203168	0.163048	0.128705	0.3422	0.3049	0.0372998
18	B	2	2.27		0	0.161														4.10912
18	B	3	1.95		0	0														0.978888
25	B	1	2.66	0.32917			0.41	3.18	1.35394	0.496896	0.0161119	0.771746	0.254828	0.038479	0.104989	0.093267	0.44156	0.0657924	0.375768
25	B	2	3.82		0.17548	0														0.517088
25	B	3	2.66		0.09648	0.08127														0.710942
26	B	1	3.67	1.16371			1.32	5.64	1.29184	0.410805	0.0395303	0.781563	0.69363	0.126241	0.221962	0.305891	0.46242	0.109131	0.353289
26	B	2	3.84		0.046	0														1.09422
26	B	3	2.67		0.25276	0.4														1.44077
30	B	1	2.98	1.63304			25.801	17.452	2.07706	0.315713	0.00560806	1.70111	0.151682	0.0535437	0.0109818	0.0740208	0.55726	0.517695	0.0396769
30	B	2	2.78		0.208	0.1														1.59251
30	B	3	2.75		0.074	0														2.46987
31	B	1	2.25	0.64089			0.08	0.06	1.359	0.167157	0.0232389	1.14292	0.35775	0.0754853	0.0361327	0.229318	0.123975	0.039796	0.084179
31	B	2	2.22		0.81412	0.55553														3.77129
31	B	3	2.13		0.555	1.45052														2.6437
33	B	1	2.78	1.94253			8.32785	6.00828	1.73194	0.450304	0.00363707	1.17599	0.28078	0.130563	0.0105573	0.12242	0.53932	0.0830553	0.456265
33	B	2	1.84		0.13332	0.115														2.26696
33	B	3	2.93		0.120432	0.025														2.0977
34	B	1	1.8	0.96949			7.67	5.465	1.1502	0.0965018	0.00816642	1.00527	0.2466	0.01958	0.0670752	0.149686	0.16308	0.0220158	0.141064
34	B	2	1.84		0.06728	0.05815														1.02695
34	B	3	2.71		0	0.17973														0.84267
37	B	1	3.27	2.69442			0.49	1.92	1.37994	0.594754	0.0306347	0.660991	0.88944	0.278395	0.308636	0.19123	0.36624	0.178725	0.187515
37	B	2	2.83		0.08	0														1.85695
37	B	3	2.56		0	0														3.13032
8	C	1	2.49	1.23017			15.68	10.55	1.42926	0.411627	0.0378754	0.976185	0.35856	0.0964526	0.0314457	0.227686	0.30876	0.254109	0.0546505
8	C	2	3.14		0.32	0.44														1.42476
8	C	3	2.26		0.24933	0.08493														2.62498
17	C	1	4.44	1.04962			10.01	9.14	2.22888	0.376681	0.141534	1.61148	0.50172	0.0747563	0.108372	0.276448	0.888	0.127872	0.760128
17	C	2	2.76		0.062	0.367														4.70951
17	C	3	3.74		0.18412	0														1.2975
28	C	1	3.63	0.65451			4.04	5.48	2.36313	0.647498	0.0368648	1.54549	0.57717	0.084844	0.0575438	0.378046	0.43197	0.185747	0.246223
28	C	2	3.5		0.038	0.017														1.05095
28	C	3	4.26		0.24573	0.349														1.68351
35	C	1	2.15	0.67245			9.55	20.26	0.817	0.227126	0.0084968	0.526965	0.7052	0.108601	0.237652	0.299005	0.301	0.072842	0.228158
35	C	2	2.46		0.02456	0														2.82472
35	C	3	2.38		0.02355	0.087														2.76157
36	C	1	1.64	1.47896			18.87	9	0.94792	0.271105	0.00843649	0.634158	0.31324	0.0864542	0.117778	0.0867675	0.1968	0.0645504	0.13225
36	C	2	1.49		0.06687	0.025														1.9743
36	C	3	1074		0.82124	0.11725														2.80452
38	C	1	1.54	1.9244			8.83	12.43	0.88242	0.354733	0.172072	0.293846	0.2387	0.0203611	0.090706	0.102402	0.148456	0.0336995	0.114756
38	C	2	1.62		0	0.05														1.734
38	C	3	2.1		0.1	0.06579														2.45344
39	C	1	3.17	0.43026			0.71	1.37	1.83226	0.489213	0.0571665	1.23678	0.76397	0.0832727	0.124527	0.530195	0.231093	0.0633195	0.167774
39	C	2	3.13		0.35335	0.184														1.80574
39	C	3	2.87		0.42955	0.047														1.9844
40	C	1	2.85	0.4795			15.08	38.41	1.0317	0.298161	0.128963	0.560213	0.58995	0.0414145	0.35515	0.153977	0.7182	0.246343	0.471857
40	C	2	3.56		0.47355	0.10774														1.57615
40	C	3	3.24		0.83867	0.26174														2.35229
42	C	1	0.76	0.53176			0.21799	0.444	0.40432	0.0513486	0.080864	0.259978	0.11096	0.0157563	0.0176426	0.0696829	0.049628	0.00764271	0.0419853
42	C	2	0.83		0.09605	0.04														1.50369
42	C	3	0.62		0.155	0														1.99689
43	C	1	0.92	1.31958			0.062	0.394	0.48392	0.0817825	0.01234	0.373102	0.1978	0.0490544	0.104438	0.0294722	0.11132	0.0260489	0.0852711
43	C	2	0.55		0	0														1.88701
43	C	3	0.68		0	0														2.65639
44	C	1	0.34	0.49159			0.07696	0.37	0.16286	0.0260576	0.0112699	0.120842	0.07038	0.0218178	0.0223808	0.0206917	0.024922	0.00834887	0.0165731
44	C	2	0.19		0.351	0.6159														1.51578
44	C	3	0.27		0.35	0.342														1.5722
45	C	1	0.69	0.425578			0.07468	4.85	0.37398	0.055723	0.00474955	0.304046	0.068793	0.0137586	0.0221513	0.0248343	0.12558	0.0219765	0.103603
45	C	2	0.73		0.00553	0.64														1.1938
45	C	3	1.13		0.01	0														1.57439
46	C	1	0.64	0.453321			0.0379	0.3822	0.29696	0.109578	0.00175206	0.168079	0.051264	0.0142001	0.00912499	0.023889	0.12736	0.0155379	0.111822
46	C	2	0.5		0.39268	0.313														3.81013
46	C	3	0.63		0.042533	0.012														3.42022
47	C	1	0.75	0.5195			0.00109	0.09	0.45	0.0684	0.006525	0.3654	0.138	0.020148	0.036708	0.07383	0.0765	0.009486	0.067014
47	C	2	0.71		0.10967	0.24196														1.30829
47	C	3	0.23		0.01673	0.01862														1.50067
48	C	1	0.75	0.48722			5.70503	12.1899	0.3825	0.048195	0.0791775	0.19584	0.0606	0.0104838	0.0174528	0.0232704	0.141	0.023829	0.117171
48	C	2	0.78		0	0.95														1.56544
48	C	3	0.89		0.282	0.24755														1.50112
